# Supplementary material for: Geometric deep learning framework for de novo genome assembly
Source: HighWire-hosted journal article supplement (doi:10.1101/gr.279307.124), 2024-10-29
Supplement: Supplemental_Fig_S4.pdf [file Supplemental_Fig_S4.pdf]

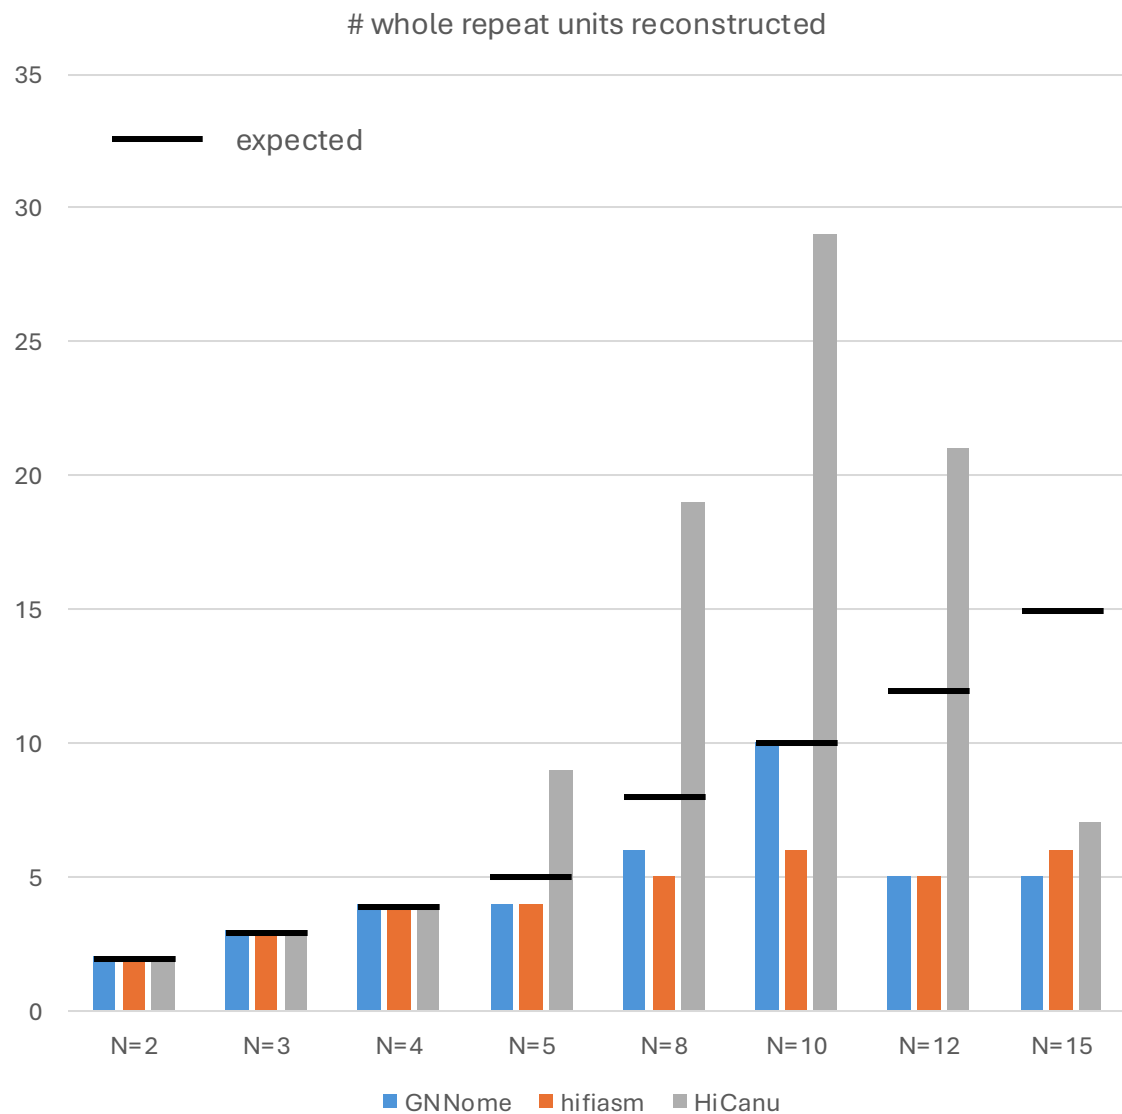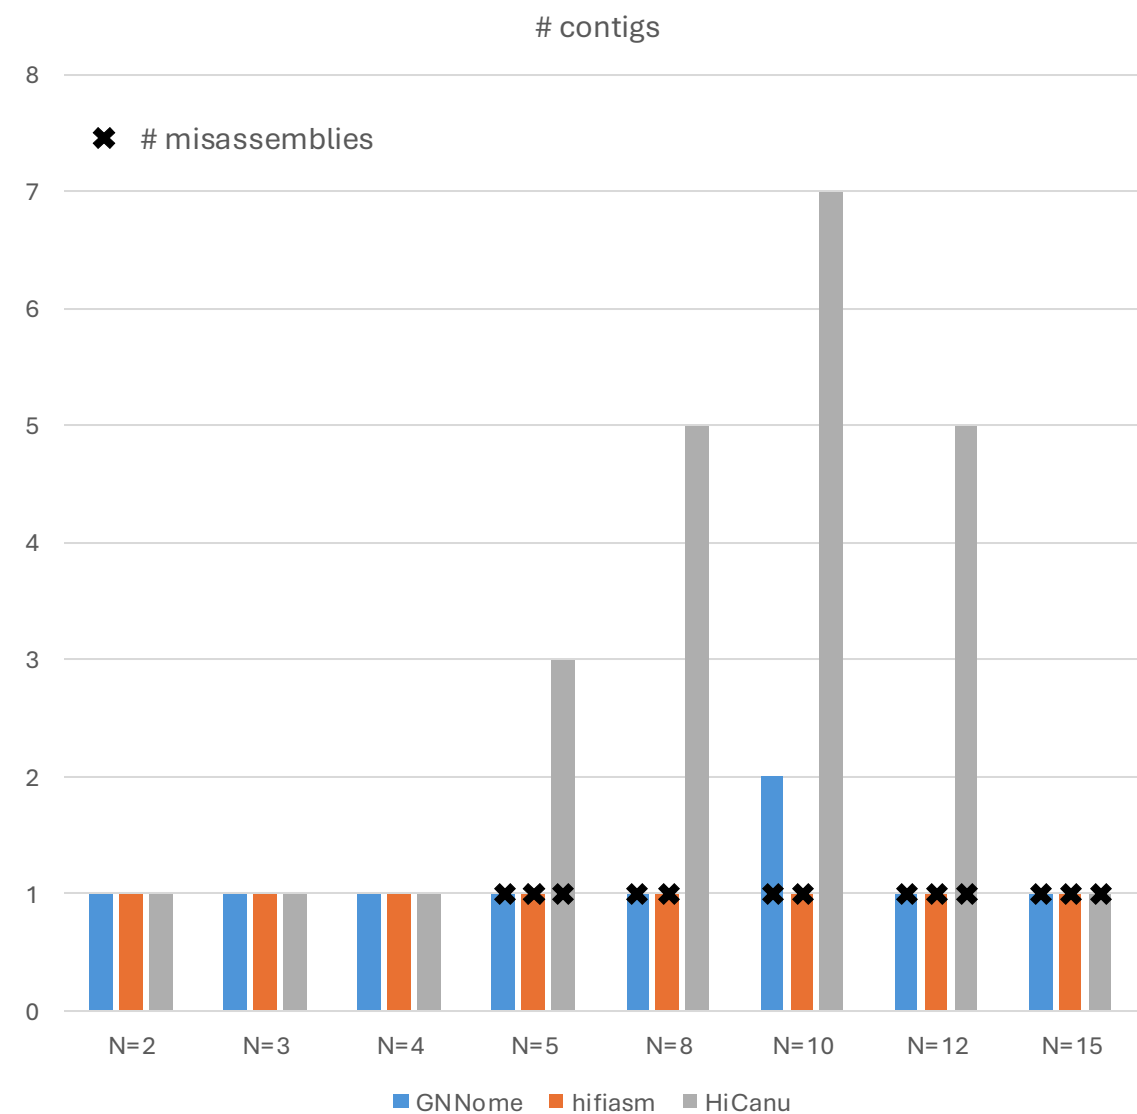

**Supplemental Figure S4:** Analysis of assemblies of simulated genomes with a varying number of perfect repeat units (N). The assemblers shown are GNNome (blue), hifiasm (orange), and HiCanu (grey). Left: number of whole repeat units reconstructed for each assembler and each genome, together with the expected number of units (black line). Right: Number of contigs produced by each assembler for each genome, together with the number of misassemblies (black cross).
