# Supplementary material for: Geometric deep learning framework for de novo genome assembly
Source: HighWire-hosted journal article supplement (doi:10.1101/gr.279307.124), 2024-10-29
Supplement: Supplemental_Fig_S5.pdf [file Supplemental_Fig_S5.pdf]

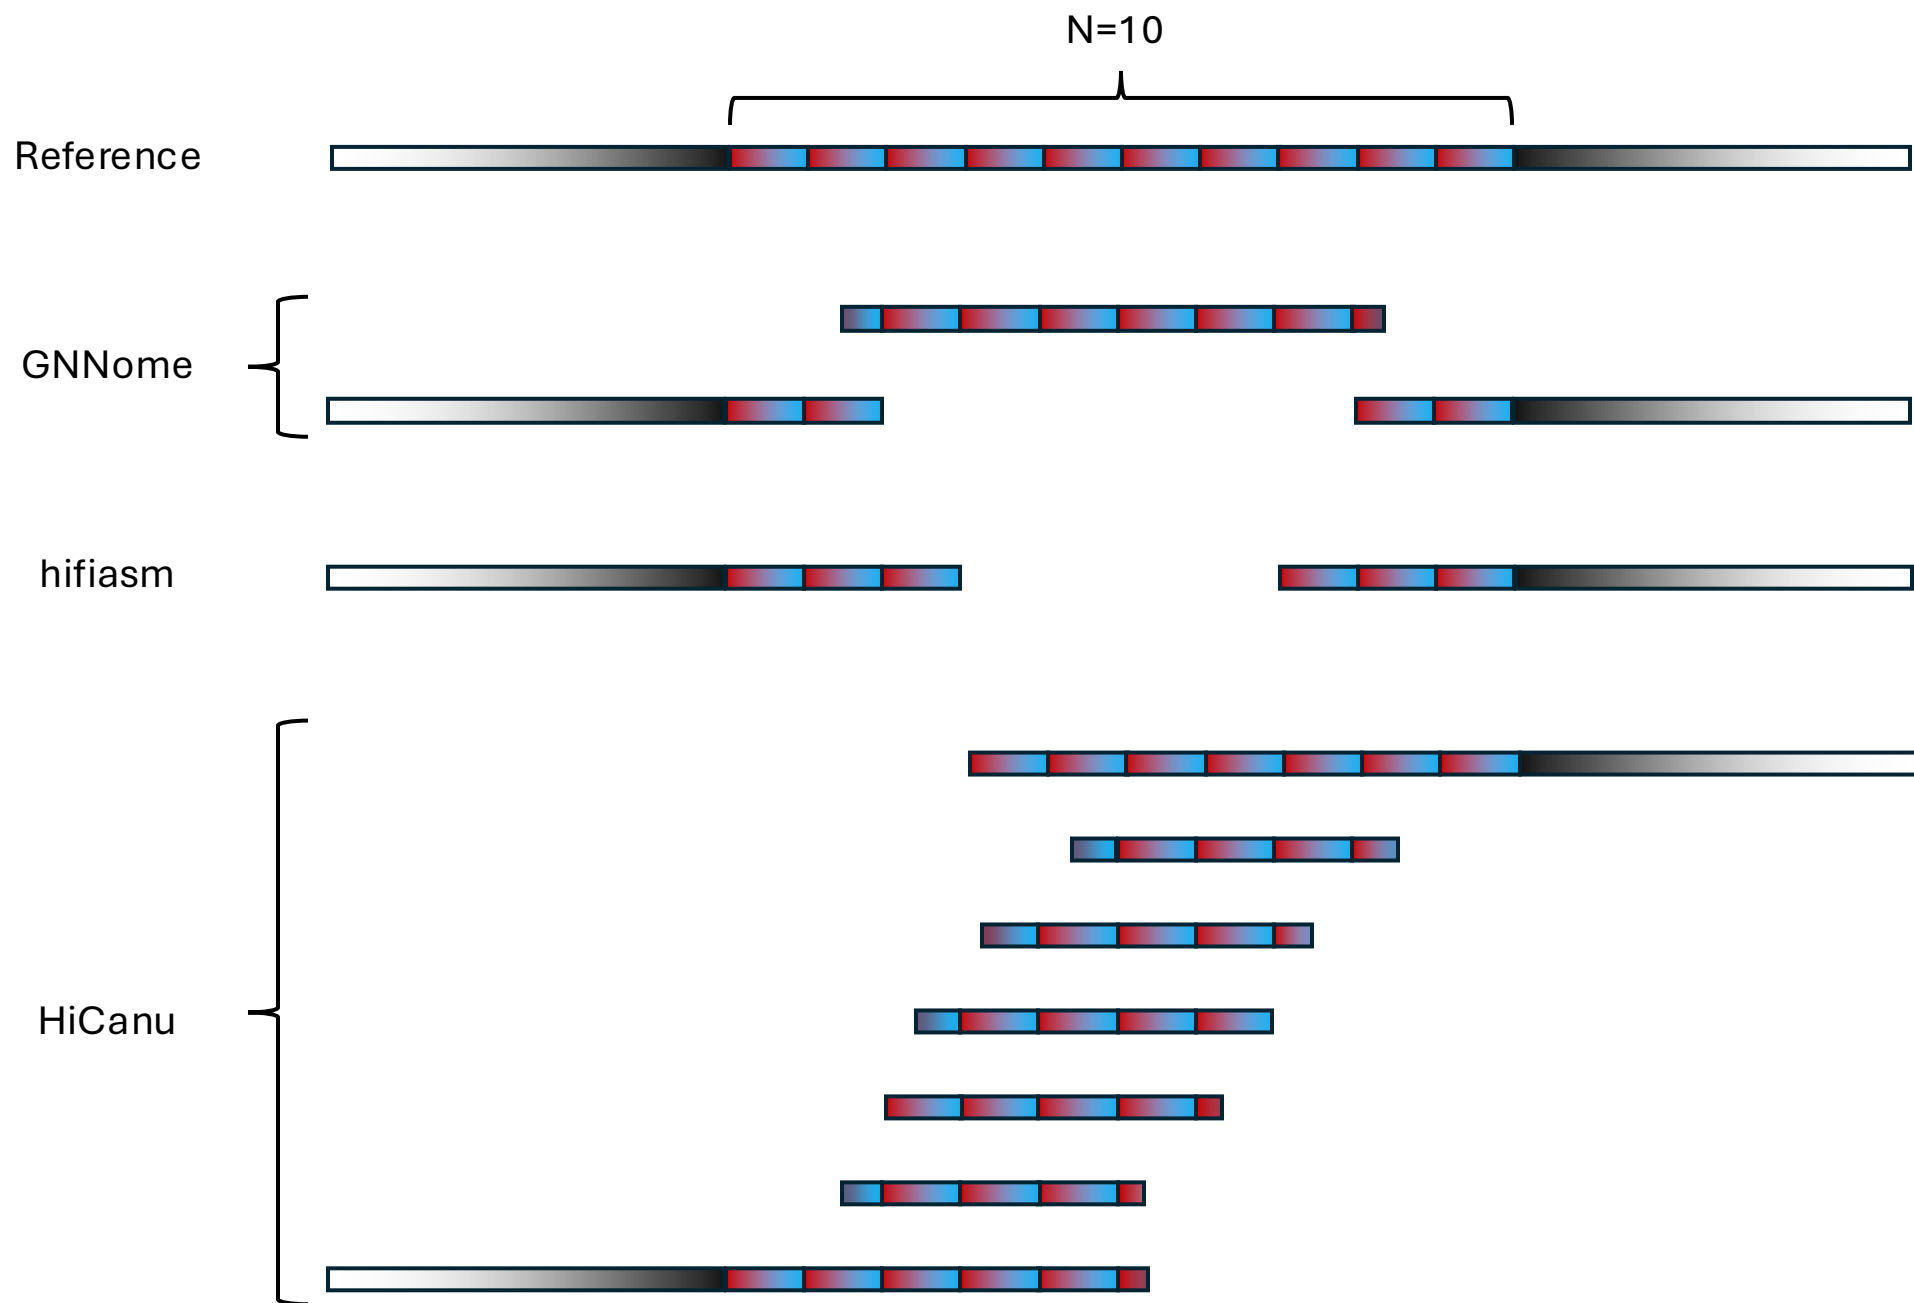

**Supplemental Figure S5:** A visualization of the simulated genome with N=10 identical repeat units and assemblies produced by GNNome, hifiasm, and HiCanu. Each unit is 5 kb long and is represented with a rectangle in blue and red (for easier visualization). Regions belonging to the same contig are horizontally aligned. Blank space between two horizontally aligned regions represents a misassembly. The black and white regions on the flanks are non-repetitive and different from each other, as well as from the repetitive units.
