# Supplementary material for: Geometric deep learning framework for de novo genome assembly
Source: HighWire-hosted journal article supplement (doi:10.1101/gr.279307.124), 2024-10-29
Supplement: Supplemental_Fig_S6.pdf [file Supplemental_Fig_S6.pdf]

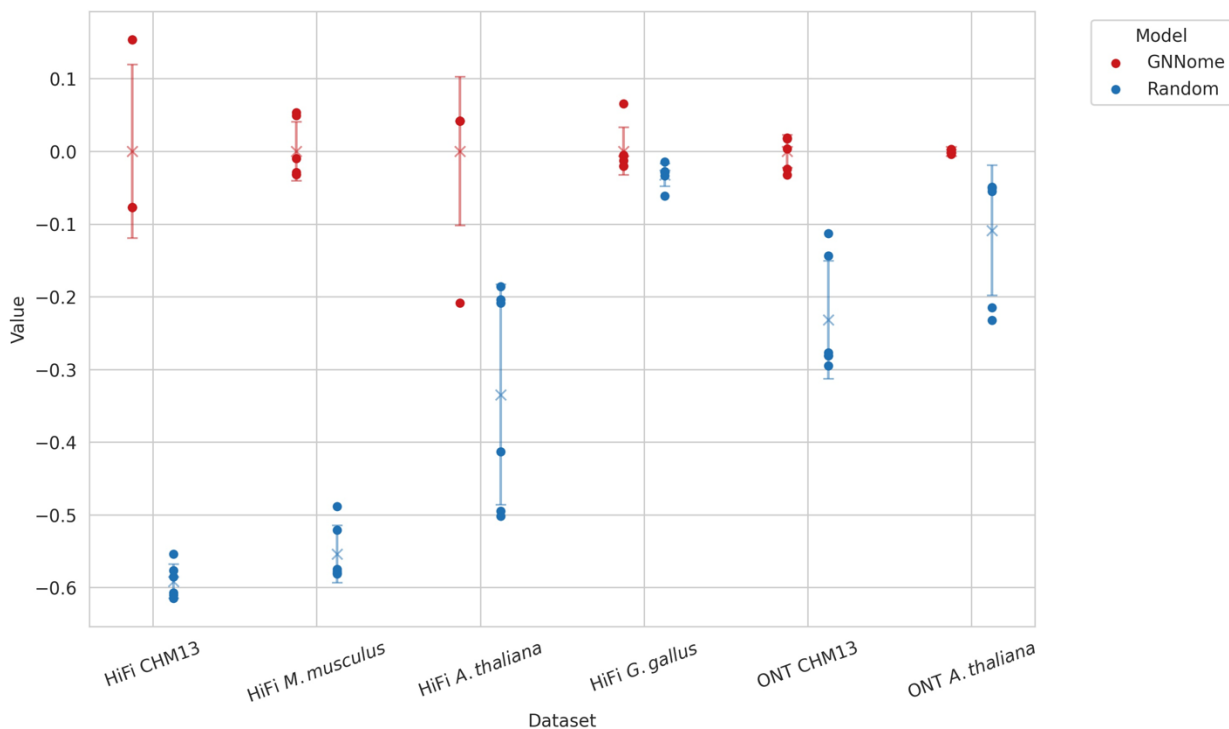

**Supplemental Figure S6:** Comparison of GNNome performance against a random walk. The GNNome model was trained six times with six different random seeds, and random walk was also run six times with different random seeds. The result of each run is represented with a dot, while the mean is represented with a cross. The error bars show one standard deviation. The value shown is the mean NGA50, normalized to the mean value of the GNNome.
