# Supplementary material for: Geometric deep learning framework for de novo genome assembly
Source: HighWire-hosted journal article supplement (doi:10.1101/gr.279307.124), 2024-10-29
Supplement: Supplemental_Fig_S7.pdf [file Supplemental_Fig_S7.pdf]

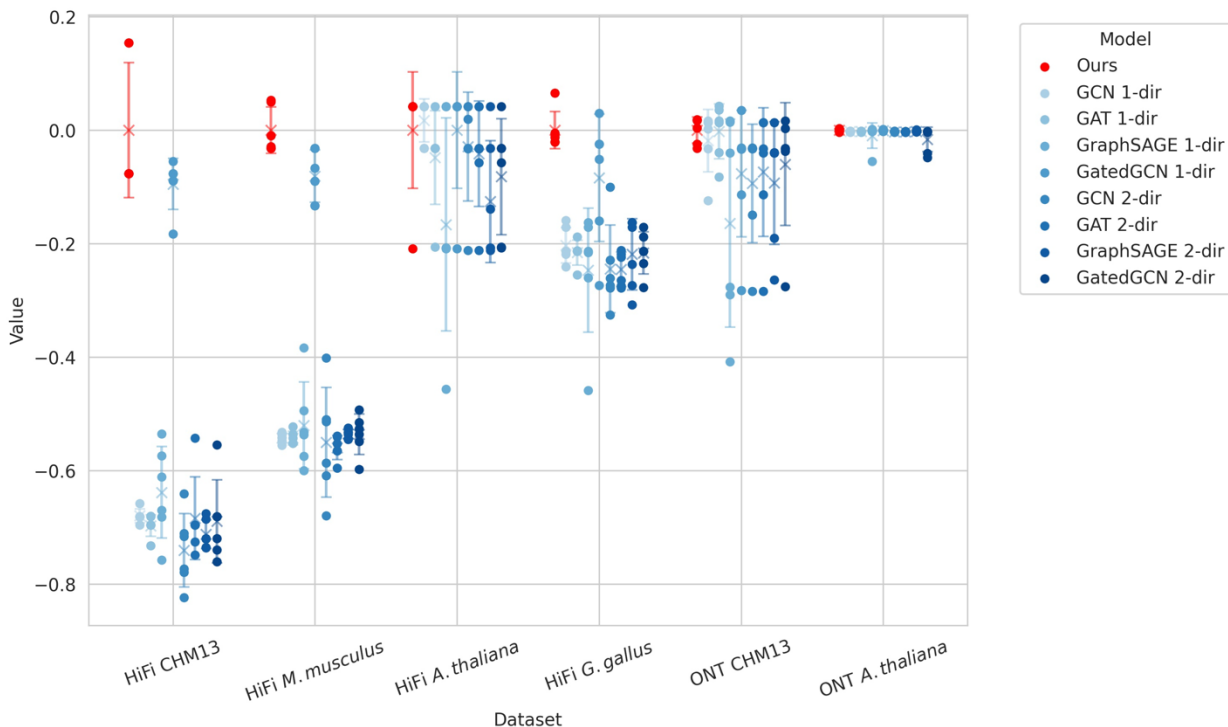

**Supplemental Figure S7:** Comparing the performance of different GNN layers. For each layer, the model was trained across six different random seeds. The result of each run is represented with a dot, while the mean is represented with a cross. The error bars show one standard deviation. The value shown is the mean NGA50 of each layer, normalized to the mean value of the best-performing layer (“Ours”). In the legend, “1-dir” stands for one-directional, meaning the message-passing was done on a directed graph, whereas “2-dir” stands for 2-directional, which means that the message passing was performed on an undirected graph.
