# Supplementary material for: Geometric deep learning framework for de novo genome assembly
Source: HighWire-hosted journal article supplement (doi:10.1101/gr.279307.124), 2024-10-29
Supplement: Supplemental_Fig_S9.pdf [file Supplemental_Fig_S9.pdf]

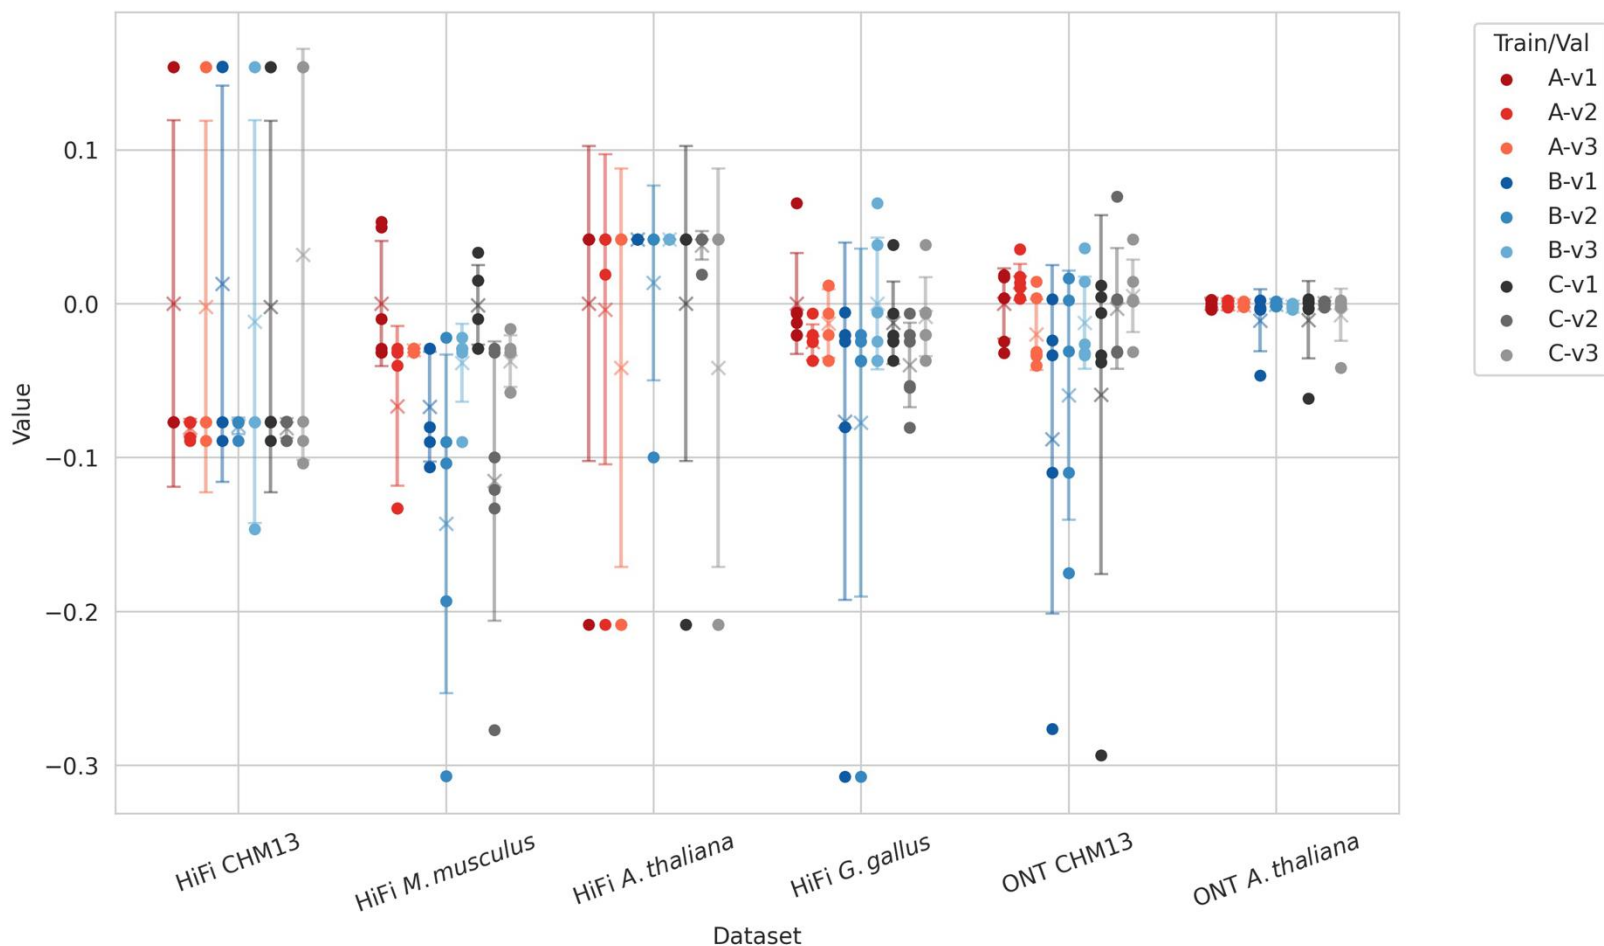

**Supplemental Figure S9:** Influence of different training datasets on the contiguity of the assemblies. For each choice of training and validation sets, a model was trained six times with six different random seeds. The result of each run is represented with a dot, while the mean is represented with a cross. The error bars show one standard deviation. The value shown is the mean NGA50, normalized to the mean value of the A-v1 training/validation set. Choices A-v1, B-v2, etc. are all described in Supplemental Note S4.
