# Supplementary material for: Geometric deep learning framework for de novo genome assembly
Source: HighWire-hosted journal article supplement (doi:10.1101/gr.279307.124), 2024-10-29
Supplement: Supplemental_Tables.xlsx [file Supplemental_Tables.xlsx]

## Sheet: Supplemental Table S1
	CHM13				M. Musculus				A. thaliana				G. gallus
Assembly	GNNome	hifiasm	HiCanu	Verkko	GNNome	hifiasm	HiCanu	Verkko	GNNome	hifiasm	HiCanu	Verkko	GNNome	hifiasm	HiCanu	Verkko
# contigs (>= 0 bp)	119	385	7976	2017	335	701	2605	980	51	472	730	1219	967	1131		1569
# contigs (>= 1000 bp)	119	385	7976	2017	335	701	2605	980	51	472	730	1219	967	1131		1569
# contigs (>= 5000 bp)	119	384	7976	2017	335	701	2605	980	51	472	730	1219	967	1131		1566
# contigs (>= 10000 bp)	119	384	7976	2016	335	701	2605	979	51	472	730	1210	967	1131		1559
# contigs (>= 25000 bp)	119	332	6691	1503	335	571	1566	720	51	396	351	291	967	1115		1333
# contigs (>= 50000 bp)	119	193	416	982	335	380	578	455	51	85	74	58	967	764		983
Total length (>= 0 bp)	3051002538	3052041464	3297269962	3080546212	2643168350	2612726297	2651054166	2608910266	139473210	151343750	152863383	158111574	1113896309	1087490254		1040541841
Total length (>= 1000 bp)	3051002538	3052041464	3297269962	3080546212	2643168350	2612726297	2651054166	2608910266	139473210	151343750	152863383	158111574	1113896309	1087490254		1040541841		Supplemental Table S1: Full QUAST report for GNNome, hifiasm, HiCanu, and Verkko assemblies of all the HiFi datasets
Total length (>= 5000 bp)	3051002538	3052039130	3297269962	3080546212	2643168350	2612726297	2651054166	2608910266	139473210	151343750	152863383	158111574	1113896309	1087490254		1040528076
Total length (>= 10000 bp)	3051002538	3052039130	3297269962	3080537450	2643168350	2612726297	2651054166	2608901204	139473210	151343750	152863383	158040160	1113896309	1087490254		1040471207
Total length (>= 25000 bp)	3051002538	3050862285	3271403359	3070503471	2643168350	2610229114	2631010593	2603933412	139473210	149737110	145446386	141798288	1113896309	1087145332		1036249829
Total length (>= 50000 bp)	3051002538	3045801967	3047286916	3052867112	2643168350	2603319501	2601079264	2594829842	139473210	139195162	136572889	134744896	1113896309	1073695911		1024099675
# contigs	119	384	7976	2017	335	701	2605	980	51	472	730	1219	967	1131		1569
Largest contig	160740832	201071606	142322078	37982637	73109009	70690234	62113422	49627317	14318542	14318523	14062429	14062409	42850540	50857683		13119126
Total length	3051002538	3052039130	3297269962	3080546212	2643168350	2612726297	2651054166	2608910266	139473210	151343750	152863383	158111574	1113896309	1087490254		1040541841
Reference length	3054832041	3054832041	3054832041	3054832041	2728222451	2728222451	2728222451	2728222451	133725193	133725193	133725193	133725193	1053332251	1053332251		1053332251
GC (%)	40.8	40.82	40.78	40.85	41.74	41.74	41.76	41.76	36.92	37.05	37.51	38.1	42.29	42.42		42.3
Reference GC (%)	40.85	40.85	40.85	40.85	41.67	41.67	41.67	41.67	36.34	36.34	36.34	36.34	42.2	42.2		42.2
N50	111255139	87680993	66217350	9396093	23270795	22302293	11659049	16680712	12171502	12171525	8414041	9451629	9919335	11471456		3818144
NG50	111255139	87680993	69698130	9423480	22954459	21050930	11150319	15852969	12442418	12442386	8629083	10345095	10818260	11487363		3759978
N90	35032691	36732441	1848133	2044537	5539792	5803224	2582207	3920219	2400279	108669	43026	24556	458420	728486		428385
NG90	35032691	36732441	13334169	2246369	3799450	3700750	1986976	2673057	3287702	3101329	1897718	1287040	1153990	1147023		354898
auN	9.84977e+07	9.86496e+07	5.99798e+07	1.09495e+07	2.75309e+07	2.61402e+07	1.5017e+07	1.87456e+07	9.82037e+06	9017518	7.91465e+06	7627787	1.2226e+07	1.51985e+07		4.45947e+06
auNG	9.83742e+07	9.85594e+07	6.47399e+07	1.10417e+07	2.66727e+07	2.50335e+07	14592237	1.79258e+07	1.02425e+07	1.02056e+07	9.04737e+06	9.0188e+06	1.2929e+07	15691366		4.40532e+06
L50	12	12	18	102	36	38	64	50	6	6	7	7	34	28		82
LG50	12	12	16	101	38	40	67	54	5	5	6	6	31	27		83
L90	31	32	103	359	124	128	241	172	15	39	96	312	210	157		381
LG90	31	32	57	348	140	150	271	204	13	13	16	18	135	123		410
# misassemblies	44	23	24	43	707	706	781	705	129	342	106	229	2434	2164		1340
# misassembled contigs	26	16	22	35	127	194	263	212	18	190	72	167	309	288		338
Misassembled contigs length	1246101349	522289331	6434171	1838883	1070915415	893068062	541245405	595421062	7634291	8675321	2727152	5407666	610547048	568036847		187124667
# local misassemblies	86	101	51	30	1053	1007	1205	1005	90	56	52	54	8391	7231		3819
# scaffold gap ext. mis.	0	0	0	0	0	0	0	0	0	0	0	0	0	0		0
# scaffold gap loc. mis.	0	0	0	0	0	0	0	0	0	0	0	0	0	0		0
# possible TEs	2	2	2	4	32	34	28	24	0	0	2	0	244	204		156
# unaligned contigs	0 + 28 part	0 + 17 part	0 + 27 part	0 + 24 part	16 + 162 part	117 + 282 part	110 + 416 part	92 + 326 part	0 + 10 part	31 + 289 part	11 + 78 part	81 + 239 part	28 + 342 part	58 + 352 part		20 + 335 part
Unaligned length	2154363	347069	160201	50435	32729661	34324692	32487904	27691097	480709	9989109	2072743	6468385	58216533	59612040		31494918
Genome fraction (%)	99.599	99.511	99.658	99.798	96.184	96.234	96.246	96.245	99.981	99.972	99.908	99.795	90.966	91.707		90.058
Duplication ratio	1.002	1.002	1.083	1.01	1.022	1.009	1.025	1.01	1.039	1.057	1.128	1.136	1.101	1.064		1.065
# N's per 100 kbp	0	0	0	0	0	0	0	0	0	0	0	0	0	0		0
# mismatches per 100 kbp	1.9	0.82	0.81	0.4	9.52	9.33	10.11	9.17	16	13.56	11.62	15.78	73.88	67.17		41.34
# indels per 100 kbp	0.73	0.68	6.18	1.17	6.15	5.8	7.87	5.7	2.34	3.63	13.35	14.51	25.26	24.8		21.52
Largest alignment	160700147	181631036	142322064	37982637	66191583	66191936	62071924	49626461	14271898	14271943	14061756	14061737	32718263	40235284		13119110
Total aligned length	3048633710	3046088075	3297035117	3080408412	2609161490	2577585991	2617944340	2580676728	138964699	141273630	150764344	151607537	1051601240	1024849024		1006936046
NA50	87682347	87680638	66217192	9396093	19284066	19349274	10699355	14852903	12171130	12170962	8414041	9451177	8427885	9140023		3729752
NGA50	87682347	87680638	69698130	9423480	18190257	18723873	10285739	13723897	12439705	12439673	8629026	10344996	9103649	9907841		3648979
NA90	28637721	34282757	1848122	2044537	3934228	4360494	2215664	3488200	2400267	57730	36528	19826	83845	65193		164803
NGA90	28637721	34282757	13334135	2246357	3077610	2692311	1571327	2223777	3101327	3101329	1897718	1287040	249072	148766		123218
auNA	8.53545e+07	9.0955e+07	5.99775e+07	10949283	2.26218e+07	2.21836e+07	14198377	1.72944e+07	9.78067e+06	9.00245e+06	7.91224e+06	7621206	9.40783e+06	1.10712e+07		4.23126e+06
auNGA	8.52475e+07	9.08719e+07	6.47375e+07	1.10414e+07	2.19166e+07	2.12445e+07	1.37968e+07	1.65381e+07	1.02011e+07	1.01885e+07	9.0446e+06	9.01102e+06	9.94875e+06	1.14302e+07		4.17988e+06
LA50	13	13	18	102	43	43	69	54	6	6	7	7	41	36		85
LGA50	13	13	16	101	45	46	72	59	5	5	6	6	38	34		87
LA90	37	34	103	359	153	149	266	188	15	55	109	361	679	586		514
LGA90	37	34	57	348	175	179	303	226	13	13	16	18	246	257		593

## Sheet: Supplemental Table S2
	CHM13				A. thaliana
Assembly	GNNome	Raven	Flye	Shasta	GNNome	Raven	Flye	Shasta
# contigs (>= 0 bp)	91	153	473	771	24	32	46	59
# contigs (>= 1000 bp)	91	148	457	733	24	32	46	57
# contigs (>= 5000 bp)	91	138	412	669	24	30	46	55
# contigs (>= 10000 bp)	91	125	377	617	24	28	43	54
# contigs (>= 25000 bp)	91	109	305	526	24	23	36	49
# contigs (>= 50000 bp)	91	106	245	413	24	20	32	40
Total length (>= 0 bp)	2984357306	2906961153	2850846078	2883588066	131231602	125311879	124043499	114512208		Supplemental Table S2: Full QUAST report for GNNome, Raven, Flye, and Shasta assemblies of all the ONT datasets
Total length (>= 1000 bp)	2984357306	2906958489	2850834565	2883572777	131231602	125311879	124043499	114511677
Total length (>= 5000 bp)	2984357306	2906924459	2850715356	2883396294	131231602	125303765	124043499	114505701
Total length (>= 10000 bp)	2984357306	2906820879	2850465207	2882992655	131231602	125289056	124021056	114498564
Total length (>= 25000 bp)	2984357306	2906593544	2849282353	2881382192	131231602	125216101	123919311	114419657
Total length (>= 50000 bp)	2984357306	2906493420	2847028473	2877297538	131231602	125114425	123777416	114134498
# contigs	91	145	428	694	24	32	46	56
Largest contig	184093238	138608544	138184201	167524237	30498742	16734611	15920051	14614989
Total length	2984357306	2906951406	2850779919	2883495581	131231602	125311879	124043499	114509873
Reference length	3054832041	3054832041	3054832041	3054832041	133725193	133725193	133725193	133725193
GC (%)	40.98	40.93	40.96	40.9	36.67	36.35	36.21	35.89
Reference GC (%)	40.85	40.85	40.85	40.85	36.34	36.34	36.34	36.34
N50	117072431	76100670	70994853	67832846	14552960	15012044	13723289	12160142
NG50	111009990	72644450	69953911	59744347	14552960	14501718	13723289	12160142
N90	41727563	21047334	16706714	13421917	4030813	3522064	3211221	3078920
NG90	34922872	14467102	5711181	2580156	4030813	1827983	403195	-
auN	1.15856e+08	7.309e+07	6.69438e+07	68397960	1.6033e+07	1.30083e+07	1.22218e+07	1.10345e+07
auNG	1.13183e+08	6.95518e+07	6.24722e+07	6.45617e+07	1.5734e+07	1.21899e+07	1.1337e+07	9.44894e+06
L50	10	15	16	15	4	4	5	5
LG50	11	16	17	17	4	5	5	5
L90	25	41	45	50	9	9	10	10
LG90	27	48	60	72	9	11	15	-
# misassemblies	1758	1146	134	57	242	95	7	16
# misassembled contigs	58	70	47	45	20	13	4	9
Misassembled contigs length	2784455718	1935110855	834348382	598307937	86588766	68615475	755184	47421698
# local misassemblies	1695	952	123	190	221	185	16	256
# scaffold gap ext. mis.	0	0	0	0	0	0	0	0
# scaffold gap loc. mis.	0	0	0	0	0	0	0	0
# possible TEs	30	36	2	0	4	6	0	0
# unaligned contigs	17 + 66 part	41 + 83 part	1 + 49 part	0 + 102 part	0 + 19 part	12 + 16 part	5 + 6 part	1 + 45 part
Unaligned length	81819600	39362363	1589057	1282796	2689480	1722935	261034	3815779
Genome fraction (%)	94.306	93.309	93.189	94.386	93.371	91.882	92.544	82.911
Duplication ratio	1.007	1.005	1.001	0.999	1.027	1.006	0.999	0.998
# N's per 100 kbp	0	0	0	0	0	0	0	0
# mismatches per 100 kbp	28.57	24.34	8.65	12.31	75.36	76.69	50.45	86.83
# indels per 100 kbp	59.96	57.84	68.91	38	228.8	218.72	279.79	238.66
Largest alignment	138298856	138263905	138183979	129833193	16813781	16203993	15919951	14178500
Total aligned length	2900690535	2864800761	2848596113	2881832141	128279014	123567983	123604626	110693506
NA50	75011212	59751918	69953911	57269241	14516601	14114621	13723275	8858753
NGA50	75011212	58487460	69539380	50948459	14516601	14114621	13723275	8574157
NA90	16345137	16485923	16706714	12486033	1262060	3437843	3204804	2221131
NGA90	14532190	9177561	5711181	2541120	364175	261702	365570	-
auNA	69951068	65461776	6.59895e+07	6.04134e+07	1.21397e+07	1.23429e+07	12182455	8.60886e+06
auNGA	6.83373e+07	6.22929e+07	6.15817e+07	5.7025e+07	11913335	1.15664e+07	1.13004e+07	7.37183e+06
LA50	16	16	16	17	5	5	5	5
LGA50	16	18	17	19	5	5	5	7
LA90	44	48	46	56	11	10	10	14
LGA90	48	58	61	79	14	19	16	-

## Sheet: Supplemental Table S3
Assembler	Dataset	Size [Mb]	LG50	LG90	NG50 [Mb]	NGA50 [Mb]	Complete [%]	Duplicated [%]	QV	# structural misassemblies	# local misassemblies
Hifiasm graph + Raven layout	CHM13	3024	21	83	45.2	45.2	99.53	0.68	49.37	129	161
	M. musculus	2602	61	253	13.1	12.9	99.59	1.89	42.69	704	1201
	A. thaliana	142	6	14	9.4	9.4	99.82	1.02	49.49	100	34
	G. gallus	1076	40	180	7.7	7.6	95.72	2.08	48.62	2269	6734
Supplemental Table S3: Results of Raven’s layout on hifiasm’s assembly graphs.

## Sheet: Supplemental Table S4
		Accuracy		Precision		Recall		F1 score
		Mean	Stdev	Mean	Stdev	Mean	Stdev	Mean	Stdev
Training	chr1	0.989149	0.000512362	0.99987	8.96269e-06	0.989249	0.00051193	0.994531	0.000260162
	chr3	0.990941	0.00048186	0.999884	1.23634e-05	0.99104	0.000475881	0.995443	0.000244038
	chr5	0.991429	0.000360164	0.999889	7.8115e-06	0.991526	0.000360417	0.99569	0.000182183
	chr9	0.984245	0.000956932	0.999828	1.21525e-05	0.984333	0.000963059	0.99202	0.000489274
	chr12	0.992785	0.000375581	0.999889	8.73876e-06	0.992888	0.000374262	0.996376	0.000189547
	chr18	0.985924	0.000768963	0.999887	1.42606e-05	0.985984	0.000777343	0.992887	0.000392868
	Total	0.989079	0.00313113	0.999875	2.44112e-05	0.98917	0.00314158	0.994491	0.00159689
Validation	chr6	0.992102	0.000405095	0.999862	2.78632e-05	0.992228	0.000421479	0.996031	0.0002045
	chr11	0.993544	0.00025987	0.999885	4.75748e-06	0.993652	0.000257069	0.996759	0.000131123
	chr17	0.988685	0.000687926	0.999856	4.26152e-05	0.988783	0.000709248	0.994289	0.000352687
	chr19	0.99306	0.000475979	0.999859	2.27161e-05	0.99319	0.00047264	0.996513	0.000239962
	chr20	0.993649	0.000199077	0.999871	2.6921e-05	0.99377	0.000211998	0.996811	0.000100261
	Total	0.992208	0.00192491	0.999867	2.75476e-05	0.992325	0.00193455	0.99608	0.000978452
	Supplemental Table S4: Accuracy, precision, recall, and F1 of the predicitons obtained with the best performing model on the training and validaiton set. The results are presented as mean and standard deviation for each chromosome. Standard deviation was computed with 1 degree of freedom (standard deviation of the sample)

## Sheet: Supplemental Table S5
		Version 1			Version 2			Version 3
		# graphs	# nodes	# edges	# graphs	# nodes	# edges	# graphs	# nodes	# edges
Dataset A	Training	90	18883912	248479390	60	12544408	165080536	110	17212406	225745106
	Validation	25	3330416	43746940	25	4249368	55948520	50	4829002	63758552
Dataset B	Training	90	18819212	247679086	60	12589892	165666028	110	17166922	225159614
	Validation	25	4249368	55948520	25	3330416	43746940	50	6562082	86617384
Dataset C	Training	90	17080308	224433594	60	11386226	149606716	110	16008740	209685794
	Validation	25	4327212	56999148	25	4327212	56999148	50	6639926	87668012
		Supplemental Table S5: Number of graphs, nodes, and edges in all the datasets used in the analysis of influence of training and validaiton datasets on the models performance. More information about the experiments is available in Supplemental Note S4

## Sheet: Supplemental Table S6
	Run
	0	1	2	3	4	5	Minimum
SymGatedGCN	0.0009995	0.0009854	0.001045	0.001029	0.0009858	0.001004	0.0009854
GCN 1-dir	0.00452	0.004512	0.004529	0.004544	0.00451	0.004532	0.00451
GAT 1-dir	0.004532	0.004517	0.004492	0.004522	0.004522	0.004507	0.004492
GraphSAGE 1-dir	0.00263	0.004525	0.004608	0.002695	0.002766	0.004536	0.00263
GatedGCN 1-dir	0.002638	0.002456	0.003304	0.002911	0.002577	0.003116	0.002456
GCN 2-dir	0.001727	0.001883	0.00189	0.001954	0.001828	0.002301	0.001727
GAT 2-dir	0.004528	0.004514	0.004496	0.002332	0.002201	0.004529	0.002201
GraphSAGE 2-dir	0.003188	0.004528	0.002953	0.004546	0.003196	0.004624	0.002953
GatedGCN 2-dir	0.004553	0.004562	0.004604	0.004567	0.004592	0.004618	0.004553
All features	0.0009995	0.0009854	0.001045	0.001029	0.0009858	0.001004	0.0009854
No overlap similarity	0.001263	0.001043	0.001056	0.001038	0.001307	0.001129	0.001038
No overlap length	0.001328	0.001302	0.001282	0.001369	0.001356	0.001423	0.001282
No edge features	0.00135	0.001286	0.001318	0.001327	0.001366	0.001473	0.001286
No out-degree	0.002343	0.001943	0.002186	0.001746	0.002253	0.001735	0.001735
No in-degree	0.001726	0.001905	0.001932	0.002391	0.002114	0.00201	0.001726
No node features	0.004114	0.00416	0.004165	0.004044	0.004182	0.004068	0.004044
No node, edge features		0.004865	0.00485		0.004847	0.004871	0.004847
	Supplemental Table S6: Values of the minimal validation loss of every model trained in the analysis of the influence of different GNN layers and node and edge features on the performance of the model. Runs under "SymGatedGCN" and "All features" are the same and represent the setting which we used to obtain the best performing model, whose results are presented in Tables 1 and 2.

## Sheet: Supplemental Table S7
Process	Data type	Dataset	CPU time [h]	Peak RSS [GB]
Parse GFA / Construct DGL graphs	HiFi	CHM13	2.19	116.71
	HiFi	M. musculus	4.69	195.13		Supplemental Table S7: Comparison of run time and peak memory usage for different assemblers and different parts of the GNNome pipeline. The values for Flye on ONT CHM13 were taken from the Flye paper (Kolmogorov et al. 2019). All the other values were measured by us. The steps of the GNNome pipeline were performed on an AMD EPYC 7742 processor. The GNN forward pass was performed on 32 threads, w…
	HiFi	A. thaliana	0.1	6.68
	HiFi	G. gallus	0.36	25.35
	ONT	CHM13	25.14	37.12
	ONT	A. thaliana	1.94	2.52
GNN forward pass	HiFi	CHM13	0.91	54.8
	HiFi	M. musculus	1.54	124.11
	HiFi	A. thaliana	0.06	3.61
	HiFi	G. gallus	0.14	8.28
	ONT	CHM13	0.02	1.55
	ONT	A. thaliana	0.01	0.43
Decode / Create assembly	HiFi	CHM13	1.53	60.08
	HiFi	M. musculus	7.28	80.62
	HiFi	A. thaliana	0.28	3.96
	HiFi	G. gallus	4.41	38.3
	ONT	CHM13	0.31	28.44
	ONT	A. thaliana	0.04	1.96
Hifiasm	HiFi	CHM13	318.27	116.91
	HiFi	M. musculus	127.64	92.46
	HiFi	A. thaliana	8.85	17.7
	HiFi	G. gallus	137.92	58.16
HiCanu	HiFi	CHM13	1206.92	96.61
	HiFi	M. musculus	601.18	37.78
	HiFi	A. thaliana	53.34	9.87
	HiFi	G. gallus*	19787.9	27.87
Verkko	HiFi	CHM13	1807.82	27.96
	HiFi	M. musculus	9.23	16.56
	HiFi	A. thaliana	555.72	30.33
	HiFi	G. gallus	94.67	21.69
Raven	ONT	CHM13	2324.32	256.64
	ONT	A. thaliana	4.72	21.37
Flye	ONT	CHM13	4000	450
	ONT	A. thaliana	80.15	91.15
Shasta	ONT	CHM13	111	1532.1
	ONT	A. thaliana	9.21	75.62
