# Supplementary figures and images for: Geometric deep learning framework for de novo genome assembly
Source: HighWire-hosted journal article supplement (doi:10.1101/gr.279307.124), 2024-10-29

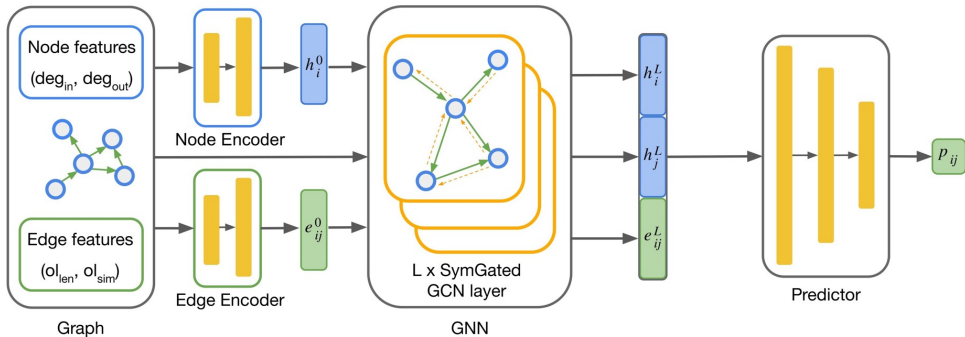

**Supplemental Figure S1:** Visualization of the model. Arrows show the flow of information.

Supplement: Supplemental_Fig_S1.pdf [file Supplemental_Fig_S1.pdf]

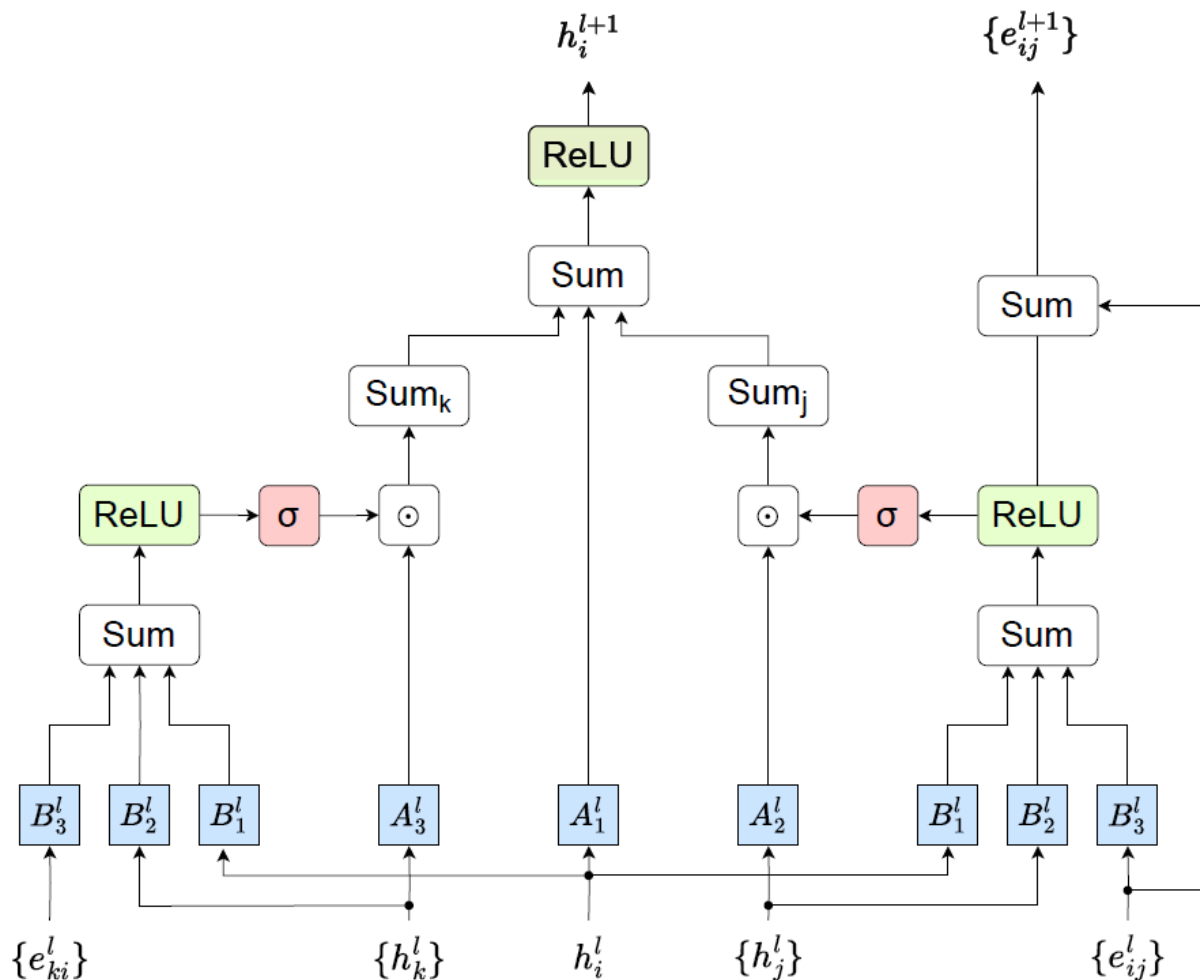

**Supplemental Figure S2:** Visualization of SymGatedGCN. The arrows show the flow of information.

Supplement: Supplemental_Fig_S2.pdf [file Supplemental_Fig_S2.pdf]
